# Phytoplankton thermal responses adapt in the absence of hard thermodynamic constraints

3 Dimitrios - Georgios Kontopoulos<sup>1,2,\*</sup>, Erik van Sebille<sup>3,4</sup>, Michael Lange<sup>5</sup>,  
Gabriel Yvon-Durocher<sup>6</sup>, Timothy G. Barraclough<sup>2</sup>, and Samraat Pawar<sup>2</sup>

1. Science and Solutions for a Changing Planet DTP;

2. Department of Life Sciences, Imperial College London, Silwood Park, Ascot, Berkshire  
6 SL5 7PY, UK;

3. Grantham Institute, Imperial College London, London SW7 2AZ, UK;

4. Institute for Marine and Atmospheric Research Utrecht, Utrecht University, Utrecht  
9 3584 CC, the Netherlands;

5. Department of Earth Science and Engineering, Imperial College London, London SW7  
2AZ, UK;

12 6. Environment and Sustainability Institute, University of Exeter, Penryn, Cornwall  
TR10 9EZ, UK;

\* Corresponding author; e-mail: [d.kontopoulos13@imperial.ac.uk](mailto:d.kontopoulos13@imperial.ac.uk).

## 15 Abstract

To better predict how populations and communities respond to climatic temperature variation, it is necessary to understand how the shape of the response of fitness-related traits  
18 to temperature evolves (the thermal performance curve). Currently, there is disagreement  
about the extent to which the evolution of thermal performance curves is constrained. One  
school of thought has argued for the prevalence of thermodynamic constraints through en-  
21 zyme kinetics, whereas another argues that adaptation can—at least partly—overcome such  
constraints. To shed further light on this debate, we perform a phylogenetic meta-analysis  
of the thermal performance curves of growth rate of phytoplankton—a globally important  
24 functional group—, controlling for environmental effects (habitat type and thermal regime).  
We find that thermodynamic constraints have a minor influence on the shape of the curve.  
In particular, we detect a very weak increase of maximum performance with the temperature  
27 at which the curve peaks, suggesting a weak “hotter-is-better” constraint. Also, instead of  
a constant thermal sensitivity of growth across species, as might be expected from strong  
constraints, we find that all aspects of the thermal performance curve evolve along the phy-  
30 logeny. Our results suggest that phytoplankton thermal performance curves adapt to thermal  
environments largely in the absence of hard thermodynamic constraints.

## Keywords

33 Thermal response, phytoplankton, thermal adaptation, constraints, growth rate, trait.

## Introduction

Temperature changes can affect the dynamics of all levels of biological organization by changing the metabolic rate of individual organisms (Brown et al., 2004; Pörtner et al., 2006; Hoffmann and Sgrò, 2011; Pawar et al., 2015). Thus, to better understand the impacts of current and future climate change on whole ecosystems, it is essential to understand how key fitness-related metabolic traits (e.g., growth rate, photosynthesis rate) respond to changes in environmental temperature.

In ectotherms, the relationship of fitness-related traits with temperature (the “thermal performance curve”; TPC) is typically unimodal (Fig. 1; Angilletta 2009). Trait values increase with temperature until a critical point ( $T_{pk}$ ), after which they drop rapidly. To understand the capacity for adaptation of the TPC to different thermal environments, it is important to investigate how the shape of the TPC evolves across species and, in so doing, to identify any constraining factors that operate over both short (ecological and microevolutionary) and long (macroevolutionary) timescales. This remains an area of ongoing debate, with multiple competing hypotheses existing in the literature. Such hypotheses can be broadly classified along a continuum that ranges from strong and insurmountable constraints on TPC evolution due to thermodynamic constraints on enzyme kinetics, to weak constraints that can be overcome through adaptation (Fig. 2).

At the strong thermodynamic constraints extreme, the “hotter-is-better” hypothesis (Frazier et al., 2006; Kingsolver and Huey, 2008; Knies et al., 2009; Angilletta et al., 2009; Angilletta, 2009) posits that TPCs evolve under severe constraints, due to the impact of thermodynamics on enzyme kinetics. More precisely, it predicts that a rise in the peak temperature ( $T_{pk}$ ) through adaptation to a warmer environment will necessarily lead to an increase in the maximum height of the curve ( $B_{pk}$ ; Fig. 2A). This adaptive increase in  $B_{pk}$  with temperature is assumed to be the direct outcome of the acceleration of enzyme-catalysed reactions because enzyme activity also has a unimodal relationship with temperature (Feller, 2010). Hotter-is-better is implicit in the “Universal Temperature Dependence” (UTD) con-

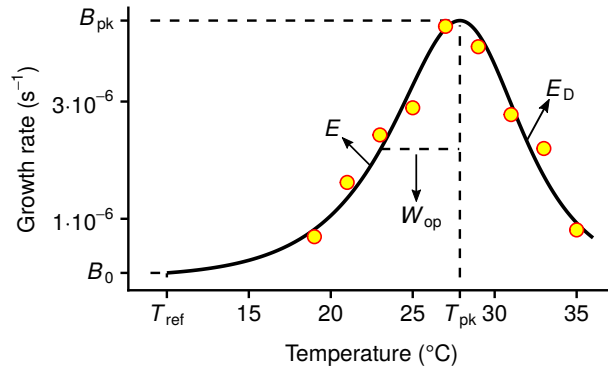

Figure 1. The relationship of growth rate ( $r_{\max}$ ) with temperature in ectotherms (the thermal performance curve; TPC). The TPC is generally unimodal and asymmetric, here quantified by the four-parameter Sharpe-Schoolfield model (black line; Schoolfield et al. 1981) fitted to growth rate measurements of the dinoflagellate *Amphidinium klebsii* (Morton et al., 1992). The parameters of the model are  $B_0$  (in units of  $s^{-1}$ ),  $E$  (eV),  $T_{pk}$  (K), and  $E_D$  (eV).  $B_0$  is the growth rate at a reference temperature below the peak ( $T_{ref}$ ) and controls the vertical offset of the TPC.  $E$  sets the rate at which the curve rises and is, therefore, a measure of thermal sensitivity at the operational temperature range.  $T_{pk}$  is the temperature at which growth rate is maximal, and  $E_D$  controls the fall of the curve. Two other parameters control the shape of the curve and can be calculated from the four main parameters:  $B_{pk}$  ( $s^{-1}$ ); the maximum height of the curve, and  $W_{op}$  (K); the operational niche width, which we define as the difference between  $T_{pk}$  and the temperature at the rise of the curve where growth rate is half of  $B_{pk}$ . Further information regarding the assumptions of the model are provided in the section “Estimation of TPC parameter values” of the Methods.

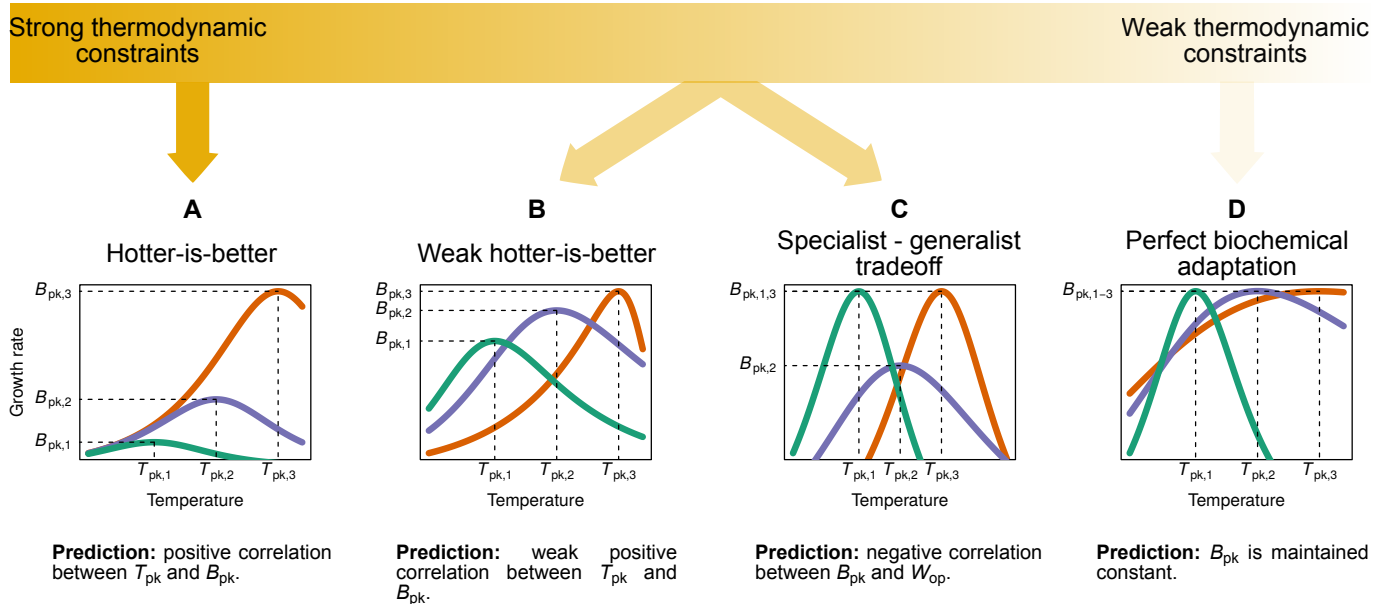

Figure 2. The spectrum of hypotheses for the evolution of thermal performance curves across species. A key area of difference among these hypotheses concerns the impact of thermodynamic constraints on the shape of the TPC. Thus, hypotheses can be classified between those lying near the strong thermodynamic constraints end, the middle of the spectrum, or the weak thermodynamic constraints end where thermodynamic constraints can be overcome through biochemical adaptation. It is worth clarifying that in panel D, the maximum value that  $B_{pk}$  can take would also be under a thermodynamic constraint, but this constraint would be different from those assumed in panels A and B. A detailed description of each hypothesis and its assumptions (e.g., the impact of body size on trait performance) is provided in the main text.

cept of the Metabolic Theory of Ecology (MTE; Brown et al. 2004). MTE also (implicitly) posits that increases in  $B_{pk}$  should be associated with body size declines, as metabolic trait performance (normalised to a standard temperature) scales negatively with body size across diverse taxonomic groups (Brown et al., 2004). In its strictest form (Fig. 2A), hotter-is-better makes a number of strong and possibly unrealistic assumptions. First, because of thermodynamic constraints,  $E$  (a measure of thermal sensitivity, also referred to as “activation energy”; Fig. 1) is expected to vary very little across species, with negligible capacity for environmental adaptation (the UTD; Gillooly et al. 2006). Second, if  $B_0$  is calculated at a low enough normalisation temperature ( $T_{ref}$ ), then it is expected to be nearly invariant, that is, performance at a low temperature would be almost constant across species (Fig. 2A). This also implies that the body size-scaling of growth rate predicted by MTE must occur at temperatures close to the peak of the curve and not at a low  $T_{ref}$ .

Thus, under the strict hotter-is-better hypothesis, both  $B_0$  (at a low  $T_{ref}$ ) and  $E$  must be nearly constant across species. Relaxing at least one of these leads to a more realistic weak hotter-is-better hypothesis (Figs. 2B; also see SI Fig. S1 for three variants). For example, variation in  $B_0$  can arise from vertical shifts in the whole TPC, driven by changes in body size (Brown et al., 2004). Part of the variation in  $B_0$  may also be driven by the process of metabolic cold adaptation, which results in an elevation of baseline performance in species adapted to low-temperature environments (e.g., see Wohlschlag 1960; Clarke 1993; Seibel et al. 2007; White et al. 2012; Clarke 2017; DeLong et al. 2018). Similarly, recent work has shown that significant variation in  $E$  exists within and across species, suggesting that this variation is likely adaptive (Dell et al., 2011; Nilsson-Örtman et al., 2013; Pawar et al., 2016; García-Carreras et al., 2018). In any case, under a weak hotter-is-better hypothesis, growth rate is still expected to increase with temperature but the correlation between  $T_{pk}$  and  $B_{pk}$  should be weaker.

A third hypothesis, also lying in the middle of the spectrum, is the specialist-generalist tradeoff hypothesis (Huey and Hertz 1984; Angilletta 2009; Fig. 2C). It posits a tradeoff

between maximum trait performance ( $B_{pk}$ ) and thermal niche width ( $W_{op}$ ). That is, a widening of the niche necessarily incurs a metabolic cost (e.g., a cost in enzyme performance), leading to a decrease in peak performance. Note that the weak hotter-is-better and the specialist-generalist tradeoff hypotheses are not mutually exclusive, as their predictions stem from very different mechanisms which could potentially interact.

Finally, at the other end of the spectrum lies a class of hypotheses which posit that the influence of thermodynamic constraints should be minimised through adaptation of species' biochemical machinery (Hochachka and Somero, 2002; Clarke and Fraser, 2004; Angilletta, 2009; Clarke, 2017). An extreme example is “perfect biochemical adaptation”, which posits that adaptation should allow species to maximise their performance ( $B_{pk}$ ) in any thermal environment (Fig. 2D) by overcoming biochemical constraints. An upper limit to the maximum possible  $B_{pk}$  across species or evolutionary lineages would still exist, but due to a different thermodynamic constraint from that expected under hotter-is-better. This hypothesis further predicts the existence of strong correlations between environmental conditions and TPC parameter values (due to adaptation), with the exception of  $B_{pk}$  which would be nearly invariant. While some studies have found support for biochemical adaptation (e.g., for photosynthesis rate; Padfield et al. 2016, 2017), it remains unclear whether adaptation can indeed equalize  $B_{pk}$  across different environments.

The above hypotheses are not an exhaustive list but lie on a spectrum (Fig. 2). To understand the position of different metabolic traits and/or species groups on this spectrum, it is necessary to investigate i) the correlations between multiple thermal parameters and ii) how each thermal parameter evolves across species. Here we tackle this challenge by performing a thorough phylogenetic analysis to investigate the evolution of TPCs of a fundamental measure of fitness—population growth rate ( $r_{max}$ )—using a global database for phytoplankton species. We chose phytoplankton as a study system for ecological and practical reasons. First, phytoplankton form the autotroph base of most aquatic food webs and contribute around half of the global primary production (Field et al., 1998). Second,

phytoplankton are one of the few species groups for which sufficiently large TPC datasets for growth rate are available.

117 Within phytoplankton, we also explore whether the impact of thermodynamic constraints on the shape of the TPC varies between freshwater and marine species. In particular, as freshwater phytoplankton have a relatively more limited potential for dispersal compared to  
120 marine phytoplankton which are passively moved by ocean currents across large distances (Doblin and van Sebille, 2016), the timescale of temperature fluctuations that the former experience can be quite different from that of the latter. Such intricacies of the marine envi-  
123 ronment could potentially be reflected in the TPCs of marine species, which could be under stronger selection for overcoming thermodynamic constraints. Through this detailed analysis, we also shed light on the processes that underlie the Eppley curve (i.e., the relationship  
126 between the maximum possible growth rate of all marine phytoplankton and temperature; Eppley 1972), which is widely used in marine ecosystem models (e.g., Palmer and Totterdell 2001; Stock et al. 2014).

## 129 **Methods**

To understand whether and how thermodynamic constraints influence the evolution of the shape of TPCs of phytoplankton, here we analyse the correlations between TPC parameters  
132 across species. For this, we take a phylogenetic comparative approach which allows us to partition the covariance between six TPC parameters of phytoplankton into a phylogenetically heritable component, a fixed effects component, and a residual component. To this  
135 end, we estimate the amount of heritable covariance by building a phylogeny of the species in our dataset and combining it with multi-response regression models. To reduce confounding effects of the local environment on TPC parameter covariances, we control for the habitat  
138 of species/strains as well as the latitude of their isolation locations through the fixed effects component of our models. For marine species in particular, we also simulate the trajectories



of drifting marine phytoplankton to get realistic estimates of the temperatures that they  
141 experience through drifting.

## Data

We compiled a global database on growth rate performance of phytoplankton species by  
144 combining the previously published datasets of López-Urrutia et al. (2006), Rose and Caron  
(2007), Bissinger et al. (2008), and Thomas et al. (2012). Growth rates across temperatures  
were typically measured under light- and nutrient-saturated conditions in these studies.  
147 Species names were standardised by querying the Encyclopedia of Life (Parr et al., 2014)  
via the Global Names Resolver (Global Names Architecture, 2017), followed by manual  
inspection. This ensured that synonymous species names were represented under a common  
150 name. From 795 original species/strain names, this process yielded 380 unique taxa from  
nine phyla. Where multiple strains of the same species (or isolates from different locations)  
were available, we did not perform any averaging of growth rate measurements, but analyzed  
153 each isolate separately. This allowed us to capture both the inter- and intraspecific variation,  
where possible. The isolation locations of species/strains in the dataset ranged in latitude  
from 78°S to 80°N (Fig. S2 in the Supporting Information (SI)).

156 For cell volume data, those available from original studies were combined with median  
volume measurements reported by Kremer et al. (2014) and with measurements from Kre-  
mer et al. (2017). This process resulted in a dataset with cell volumes for 132 species of  
159 phytoplankton, spanning seven orders of magnitude.

## Estimation of TPC parameter values

To quantify all key features of the shape of each growth rate TPC, we used a modified  
162 formulation (with  $T_{pk}$  as an explicit parameter; SI section S3.1) of the four-parameter variant  
of the Sharpe-Schoolfield model (Schoolfield et al. 1981; Fig. 1):

$$B(T) = B_0 \cdot \frac{e^{\left[ \frac{-E}{k} \cdot \left( \frac{1}{T} - \frac{1}{T_{\text{ref}}} \right) \right]}}{1 + \frac{E}{E_D - E} \cdot e^{\left[ \frac{E_D}{k} \cdot \left( \frac{1}{T_{\text{pk}}} - \frac{1}{T} \right) \right]}}. \quad (1)$$

Here, the growth rate,  $B$  ( $\text{s}^{-1}$ ), at a given temperature  $T$  (K) is expressed as a function  
165 of four parameters ( $B_0$ ,  $E$ ,  $E_D$  and  $T_{\text{pk}}$ ; see Fig. 1 for their description and units), and  
the Boltzmann constant,  $k$  ( $8.617 \cdot 10^{-5} \text{ eV} \cdot \text{K}^{-1}$ ). The key assumption of this model is  
that growth rate is controlled by a single rate-limiting enzyme which is deactivated at high  
168 temperatures, and which operates at a decreased rate at low temperatures because of low  
available kinetic energy. While this assumption is shared by many TPC models, its validity  
remains under debate (Clarke 2017; DeLong et al. 2017). For example, growth rate may be  
171 determined by the effects of temperature on both the activity and the stability (free energy)  
of one or multiple catalyzing enzymes (DeLong et al., 2017). Other factors besides enzyme  
thermodynamics might also be important, such as the transport of reaction products in the  
174 cell (Ritchie, 2018). Nevertheless, the Sharpe-Schoolfield model remains widely used because  
it adequately captures the relationship between metabolic traits and temperature (e.g., see  
Padfield et al. 2016; Salis et al. 2016; Bestion et al. 2018; Francis et al. 2019).

177 Furthermore, because the Sharpe-Schoolfield model has an exponential term in its numer-  
ator (Eq. (1)),  $B(T)$  values estimated with the model will necessarily be positive. Therefore,  
any negative or zero growth rate measurements had to be removed from the dataset before  
180 fitting the model to data. As we show in section S3.2 of the SI, using a model that can  
accommodate non-positive growth rates instead of the Sharpe-Schoolfield model would not  
qualitatively change the results of our study. Thereafter, we fitted the Sharpe-Schoolfield  
183 model separately to each species/strain in the dataset, using the Levenberg-Marquardt non-  
linear least squares minimization algorithm (SI section S3.3). After obtaining estimates of  
the four main model parameters, we used them to calculate the values of two more parame-  
186 ters:  $B_{\text{pk}}$  and  $W_{\text{op}}$  (K) (Fig. 1). We note that we focus on  $W_{\text{op}}$  and not the full niche width

of the TPC as i) most species typically experience temperatures well below  $T_{pk}$  (Martin and Huey, 2008; Thomas et al., 2012; Pawar et al., 2016), and ii) experimentally-determined  
189 TPCs typically do not cover a sufficient temperature range to estimate the full niche width (Dell et al., 2011; Pawar et al., 2016).

For a correct comparison of  $B_0$  estimates,  $T_{ref}$  needs to be set lower than the minimum  $T_{pk}$   
192 in the dataset. Otherwise, for certain TPCs,  $B_0$  is estimated at the fall of the curve instead of the rise, and the comparison becomes meaningless. As there were a few fits with  $T_{pk}$  values close to  $0^\circ\text{C}$ , we set  $T_{ref}$  to  $0^\circ\text{C}$  (i.e., 273.15 K). However, to ensure that a performance  
195 comparison at  $0^\circ\text{C}$  does not bias the results of this study—given that some species may not tolerate that low a temperature—, we also fitted the Sharpe-Schoolfield model using a  $T_{ref}$  of  $10^\circ\text{C}$  (i.e., 283.15 K). In that case, we excluded fits with  $T_{pk} < 10^\circ\text{C}$ . All subsequent  
198 analyses were performed using both datasets (i.e., those obtained with a  $T_{ref}$  of  $0^\circ\text{C}$  and  $10^\circ\text{C}$ ), to identify potential areas of disagreement. Finally, as the estimate of  $B_0$  from the Sharpe-Schoolfield model is an approximate measure of the TPC value at  $T_{ref}$  ( $B(T_{ref})$ ) and  
201 can sometimes strongly deviate from it, depending—among others—on the choice of  $T_{ref}$  (Kontopoulos et al., 2018), we calculated  $B(T_{ref})$  manually after obtaining estimates of the four main model parameters (we henceforth refer to  $B(T_{ref})$  as  $B_0$ ).

204 Quality filtering of the fits resulted in a TPC dataset of 270 curves using a  $T_{ref}$  of  $0^\circ\text{C}$  and of 259 curves using a  $T_{ref}$  of  $10^\circ\text{C}$  (SI Figs. S4 and S5).

## Reconstruction of the phytoplankton phylogeny

207 We reconstructed the phylogeny of the species in our TPC dataset using nucleotide sequences of the small subunit rRNA gene (see Table S21 in the SI). One sequence was collected per species where possible, resulting in a dataset of 138 nucleotide sequences. Given that in-  
210 creased taxon sampling has been shown to improve the quality of phylogenetic trees (Nabhan and Sarkar, 2012; Wiens and Tiu, 2012), we also collated a second dataset of 323 sequences by expanding the previous dataset with further sequences of phytoplankton, macroalgae,

213 and land plants. The two sets of nucleotide sequences were aligned with MAFFT (v7.123b;  
Katoch and Standley 2013), using the L-INS-i algorithm. We then used the entire align-  
ments to build phylogenetic trees without masking any columns, as this has been shown to  
216 occasionally result in worse topologies when only a single gene is used (Tan et al., 2015).

Tree topologies were inferred with RAxML (v. 8.2.4; Stamatakis 2014), PhyML (v.  
20151210; Guindon et al. 2010), and ExaBayes (v. 1.4.1; Aberer et al. 2014), under the  
219 General Time-Reversible model (Tavaré, 1986) with  $\Gamma$ -distributed rate variation among sites  
(four discrete rate categories; Gu et al. 1995). For RAxML, in particular, we inferred 300  
distinct topologies using the slow hill-climbing algorithm (which performs a more thorough  
222 exploration of likelihood space than the default algorithm; option “-f o”), and selected the  
tree topology with the highest log-likelihood. For PhyML we used the default options, with  
the exception of the topology search which was set to include both the Nearest Neighbor In-  
225 terchange (NNI) and the Subtree Pruning and Regrafting (SPR) procedures. For ExaBayes,  
we executed four independent runs with four Metropolis-coupled chains per run for 55 million  
generations. Samples from the posterior distribution were obtained every 500 generations,  
228 after discarding the first 25% of samples as burn-in. We confirmed that the four ExaBayes  
runs had converged through a range of tests (see sections S4.1 and S4.2 in the SI), and  
obtained a tree topology by computing the extended majority-rule consensus tree. The best  
231 tree topology—among those produced by RAxML, PhyML, and ExaBayes—was selected on  
the basis of proximity to the Open Tree of Life (Hinchliff et al., 2015), and log-likelihood (SI  
section S4.3).

234 We then estimated relative ages for all nodes of the best topology, using the uncorrelated  
 $\Gamma$ -distributed rates model (Drummond et al., 2006), as implemented in DPPDiv (Heath  
et al., 2012; Flouri and Stamatakis, 2012). To this end, we executed five independent runs  
237 for 750,000 generations, sampling from the posterior distribution every 100 generations. As  
before, we discarded the first 25% of samples as burn-in, and performed diagnostic tests to  
ensure that the posterior distributions of the four runs had converged and that the parameters

240 were adequately sampled (SI section S4.4). To obtain the final relative time-calibrated tree,  
we sampled every 300th tree from each run (after the burnin phase) for a total of 9,375 trees,  
and calculated the median age estimate for each node using the TreeAnnotator program  
243 (Rambaut and Drummond, 2017).

## Modelling the local thermal environments of marine phytoplankton

As mentioned previously, although marine phytoplankton are passively moved by ocean  
246 currents across large distances, little attention has been given to the potential effects of this  
on their thermal physiology. In particular, Doblin and van Sebille (2016) showed that the  
temperature range that marine microbes likely experience is usually much wider if oceanic  
249 drifting is properly accounted for. Therefore, to accurately quantify the thermal regimes  
of marine phytoplankton, we simulated Lagrangian (drifting) trajectories with the Python  
package OceanParcels (Lange and van Sebille, 2017). More precisely, we used hydrodynamic  
252 data from the OFES model (ocean model for the Earth Simulator; Masumoto et al. 2004)  
to estimate 3,770 backwards-in-time replicate trajectories for each marine location in the  
dataset over 500 days (using a one-day timestep), at a depth of 2.5, 50, or 100 meters (where  
255 possible). These depth values were chosen after considering global estimates of oceanic  
euphotic depth (Morel et al., 2007), i.e. the depth below which net primary production by  
marine autotrophs becomes negative (Falkowski and Raven, 2013).

258 We then calculated the following environmental variables: i) the median temperature  
experienced, ii) the median latitude visited, iii) the interquartile range of temperatures,  
and iv) the interquartile range of latitudes. The median captures the central tendency of the  
261 temperatures or latitudes that phytoplankton experienced, whereas the interquartile range is  
a measure of deviation from the central tendency. Measuring all four variables is important,  
as each of them may have a different effect on the shape of the TPC. The values of the  
264 variables were first calculated for each trajectory over the full duration of 500 days, but  
also over the first 350, 250, 150, and 50 days. They were then averaged across all replicate

trajectories per location, depth, and duration, weighted by the length of the trajectory, as  
267 some trajectories could be estimated for fewer than 500 days. These variables are hereafter  
referred to as  $\tilde{T}_{d,t}$  (median temperature),  $\tilde{L}_{d,t}$  (median latitude),  $\text{IQR}(T_{d,t})$  (interquartile  
range of temperatures), and  $\text{IQR}(L_{d,t})$  (interquartile range of latitudes), where d and t stand  
270 for the depth and duration of the trajectory respectively.

We also obtained temperature data of the isolation locations of marine phytoplankton, in  
order to compare their explanatory power with that of the Lagrangian trajectory variables.  
273 To this end, we used the NOAA Optimum Interpolation Sea Surface Temperature dataset,  
which comprises daily measurements of sea surface temperature at a global scale and at a  
resolution of  $1/4^\circ$  (Banzon et al., 2016). Currently, two variants of this dataset are avail-  
276 able: i) “AVHRR-Only” which is primarily based on the Advanced Very High Resolution  
Radiometer, and ii) “AVHRR+AMSR” which also uses data from the Advanced Microwave  
Scanning Radiometer on the Earth Observing System. The latter variant is considered more  
279 accurate, but, for technical reasons, is only available from 2002 until 2011, whereas the for-  
mer variant is available from 1981 until the present day. In our case, we obtained a daily  
sea surface temperature dataset between the 1st of September 1981 and the 25th of June  
282 2017, using AVHRR-Only, or AVHRR+AMSR when that was available. From this dataset,  
we calculated the median temperature of each marine location ( $\tilde{T}_{\text{orig}}$ ), and the interquartile  
range of temperatures ( $\text{IQR}(T_{\text{orig}})$ ).

## 285 **Inference of TPC parameter co-evolution and associations with en- vironmental variables**

### **I. Across the entire dataset**

288 To infer the interspecific correlation structure among the parameters of the TPC and si-  
multaneously detect associations with the local environment of the species in our study, we  
fitted phylogenetic Markov Chain Monte Carlo generalised linear mixed models using the R

291 package MCMCglmm (v. 2.24; Hadfield 2010). This package can be used to fit phylogenetic  
regression models, enabling the partitioning of phenotypic trait variance into a phylogenet-  
ically heritable component, a fixed effects component of explanatory variables, and a residual  
294 variance component (i.e., variance that should be mostly due to environmental effects that  
are not already controlled for). For the purposes of this study, we constructed multi-response  
regression models (i.e., models with multiple response variables instead of one), in which the  
297 response comprised all six TPC parameters. In other words, instead of trying to predict a  
single response variable, the models would predict all six TPC parameters, while simultane-  
ously inferring their variance/covariance matrix. Each element of this matrix was estimated  
300 as a free parameter from the data, so that any correlations between pairs of TPC parameters  
could be detected.

To ensure that the distribution of each response variable was as close to normality as  
303 possible, we applied a different transformation to each TPC parameter:  $\sqrt[4]{B_0}$ ,  $\ln(E)$ ,  $T_{pk}^2$ ,  
 $\ln(B_{pk})$ ,  $\ln(E_D)$ ,  $\ln(W_{op})$ . It was necessary to perform those transformations as each response  
variable in an MCMCglmm needs to conform to one of the implemented distributions in the  
306 package (e.g., Gaussian, Poisson, multinomial), with the Gaussian distribution being the  
most appropriate here. Besides this, most macroevolutionary models assume that the evo-  
lutionary change in trait values follows a Gaussian distribution. Thus, statistical transfor-  
309 mations of trait values are often used to satisfy this assumption. In any case, applying these  
transformations does not affect our results qualitatively even though thermal parameter cor-  
relations are estimated in transformed (not linear) scale. To incorporate the uncertainty for  
312 each transformed thermal parameter estimate, we used the delta method (e.g., see Oehlert  
1992) implemented in the R package msm (v. 1.6.4; Jackson 2011) to obtain appropriate  
estimates of the variance of the standard error for  $\sqrt[4]{B_0}$ ,  $\ln(E)$ ,  $T_{pk}^2$ ,  $\ln(B_{pk})$ , and  $\ln(E_D)$ . As  
315 we manually calculated  $\ln(W_{op})$  a posteriori without an analytical solution, we performed  
bootstrapping to obtain error estimates for it.

For the majority of the TPCs in our dataset, there was at least one parameter whose value

318 could not be estimated with certainty due to lack of adequate experimental measurements (SI  
section S3.3). MCMCglmm can accommodate such missing values in the response by treating  
them as “Missing At Random” (MAR; see Hadfield 2010, de Villemereuil and Nakagawa 2014,  
321 and Tierney and Cook 2018). The MAR assumption is valid as long as i) missing values in  
a response variable can be estimated (with some uncertainty) from other components of the  
model (i.e., other covarying response variables or the phylogeny), and ii) data missingness  
324 is not driven by a variable that is not included in the model. When these two conditions  
are true, the inferred estimates of missing values are unbiased (see Nakagawa and Freckleton  
2008; Garamszegi and Møller 2011). Applying this method allowed us to include TPC  
327 parameter estimates from curves that were only partly well sampled (e.g., only the rise of  
the curve), increasing the statistical power of the analysis and reducing the possibility of  
estimation biases (e.g., in the covariances among TPC parameters).

330 The fixed effects component of each candidate model contained at the very minimum a  
distinct intercept for each response variable. Starting with this, we fitted models with i)  
no other predictors (the intercepts-only model), ii) the latitude of the isolation location of  
333 each species, iii) the habitat of each species (marine vs freshwater), or iv) both latitude and  
habitat. For models that included latitude as a predictor, we specified either the absolute  
latitude of the location or a second order polynomial (because mean environmental temper-  
336 ature and its fluctuations are approximately unimodal functions of latitude from the equator  
to mid-latitudes). In any case, we estimated the association of each fixed effect (latitude  
and/or habitat) with each response variable separately (by inferring distinct coefficients for,  
339 e.g.,  $\ln(E):|\text{latitude}|$ ,  $\ln(B_{pk}):|\text{latitude}|$ ). It is worth noting that we did not include the tem-  
perature of the environment as a fixed effect in these particular models, as there was no  
reliable temperature dataset with high enough resolution for both marine and freshwater  
342 locations. To avoid any potential biases introduced by a combination of two temperature  
datasets (one for the marine locations and one for the freshwater ones), we instead used  
latitude as a proxy for temperature variation.



345 Species identity was specified as a random effect on the intercepts. To integrate phyloge-  
netic information into the model, we first pruned the phylogeny to the subset of species for  
which data were available (SI Fig. S15). We next calculated the inverse of the phylogenetic  
348 covariance matrix from the phylogenetic tree, including ancestral nodes as this allows for  
more computationally efficient calculations (Hadfield and Nakagawa, 2010; de Villemereuil  
and Nakagawa, 2014).

351 The default prior was used for the fixed effects, whereas for the random effect and the  
residual variance components, we used a relatively uninformative inverse- $\Gamma$  prior with shape  
and scale equal to 0.001 (the lower this number the less informative is the prior). For  
354 each model, two chains were run for 100 million generations, sampling from the posterior  
distribution every 1000 generations after discarding the first 10 million generations as burn-  
in. Convergence between each pair of chains was verified by calculating the potential scale  
357 reduction factor (Gelman and Rubin, 1992; Brooks and Gelman, 1998) for all estimated pa-  
rameters (i.e., fixed effects, elements of the phylogenetically heritable and residual matrices),  
and ensuring that it was always lower than 1.1. We also confirmed that the effective sample  
360 size of all model parameters—after merging samples from the two chains—was greater than  
200, so that the mean could be adequately estimated.

Model selection was done on the basis of the Deviance Information Criterion (DIC;  
363 Spiegelhalter et al. 2002), averaged across each pair of chains. We excluded models if a  
fixed effect had a 95% Highest Posterior Density (HPD) interval that included zero for every  
single response variable (e.g., if all of  $\sqrt[4]{B_0}$ :habitat,  $\ln(E)$ :habitat,  $T_{pk}^2$ :habitat etc. had 95%  
366 HPD intervals that included zero). In frequentist statistics terms, this is roughly equivalent  
to excluding models whose predictors were not significant for any response variable.

Phenotypic correlations between pairs of TPC parameters ( $r_{phe}$ ) were broken down into  
369 their phylogenetically heritable ( $r_{her}$ ) and residual components ( $r_{res}$ ) by dividing the covari-  
ance estimate between two parameters by the geometric mean of their variances. These were  
inferred from the best-fitting model in terms of DIC.

372 Finally, we measured the phylogenetic heritability (i.e., the ratio of heritable variance to  
the sum of heritable and residual variance) of each TPC parameter. As the phylogeny is  
integrated with the MCMCglmm, the resulting estimates are equivalent to Pagel’s  $\lambda$  (Pagel,  
375 1999; Hadfield and Nakagawa, 2010), and reflect the strength of the phylogenetic signal,  
i.e., the extent to which closely related species are more similar to each other than to any  
species chosen at random (Pagel, 1999; Kamilar and Cooper, 2013; Symonds and Blomberg,  
378 2014). Strong phylogenetic signal would indicate that variation in the TPC parameter can  
be explained by its gradual evolution across the phylogeny. On the other hand, a lack of  
phylogenetic signal would reflect either trait stasis (with any variation among species be-  
381 ing noise-like) or very rapid evolution (that is independent of the phylogeny). Intermediate  
values of phylogenetic signal would imply either that the TPC parameter is under con-  
strained evolution (e.g., due to stabilizing selection), or that its evolutionary rate changes  
384 through time (e.g., an evolutionary rate acceleration could lead to the convergence of the  
niches of distantly related species). We obtained phylogenetic heritability estimates from  
the intercepts-only model as the addition of fixed effects would reduce the residual variance  
387 and bias the heritability estimates towards higher values.

## II. For the marine subset of the data

To test whether the correlation structure of thermal parameters across the entire phytoplank-  
390 ton dataset differs from that of marine species only, we also performed the above analysis  
for only the marine species in the dataset. The main difference in the specification of the  
MCMCglmms for marine species was that we used fixed effects that captured both the lati-  
393 tude and the temperature characteristics of the local environment of phytoplankton (see the  
“Modelling the local thermal environments of marine phytoplankton” section above): i) no  
fixed effects (intercepts-only model), ii)  $L_{\text{orig}}$ , iii)  $\tilde{T}_{\text{orig}}$ , iv)  $\text{IQR}(T_{\text{orig}})$ , v)  $\tilde{T}_{\text{orig}} + \text{IQR}(T_{\text{orig}})$ ,  
396 vi)  $\tilde{T}_{d, t}$ , vii)  $\text{IQR}(T_{d, t})$ , viii)  $\tilde{T}_{d, t} + \text{IQR}(T_{d, t})$ , ix)  $\tilde{L}_{d, t}$ , x)  $\text{IQR}(L_{d, t})$ , xi)  $\tilde{L}_{d, t} + \text{IQR}(L_{d, t})$ .  
All latitude variables other than  $\text{IQR}(L_{d, t})$  were specified—in different models—both as a

second order polynomial and with absolute values. A second order polynomial was also tested  
399 for  $\text{IQR}(T_{d, t})$  variables to investigate the existence of a quadratic relationship of  $\text{IQR}(T_{d, t})$   
with thermal parameters.

As there was a very large number of MCMCglms to execute (158 pairs of chains), we  
402 first ran each of them for 60 million generations. We then checked whether the two chains per  
model had converged as previously described, and reran the subset that had not converged  
for 120 million generations. At that point, all pairs of chains converged on statistically  
405 indistinguishable posterior distributions. As above, samples from the first 10% generations  
of each model were discarded as burn-in.

## Size-scaling of $B_0$ and $B_{pk}$

408 As explained in the introduction, MTE predicts that temperature-normalised  $r_{\max}$  should  
be constrained by body mass across taxonomic groups (Brown et al., 2004). However, at  
finer taxonomic resolutions (e.g., within species), this relationship may take the opposite  
411 direction, i.e., selection for high  $r_{\max}$  may lead to declines in body size as has been observed  
widely (the “temperature-size rule”; Atkinson 1996; Winder et al. 2009; Yvon-Durocher et al.  
2011; Peter and Sommer 2013; Sommer et al. 2017). For example, warming may confer a  
414 competitive advantage to smaller phytoplankton due to their higher  $r_{\max}$  (Reuman et al.,  
2014). Therefore, as a final step for understanding how TPCs evolve, we tested whether  
and how growth rate scales with body size. Under the strict hotter-is-better hypothesis,  
417 such scaling would be expected only for growth rates near each species’  $T_{pk}$ , whereas if the  
weak hotter-is-better hypothesis holds, size scaling could also—but not necessarily—occur at  
low temperatures. Understanding if the latter holds requires first the calculation of growth  
420 rate values for all TPCs at a common normalisation temperature ( $T_{\text{ref}}$ ), followed by their  
examination for any size scaling patterns. Therefore, to test both hypotheses of body size-  
scaling, we fitted MCMCglms with cell volume as a fixed effect and a single response of  
423 either i)  $B_0$  (at a  $T_{\text{ref}}$  of 0°C), ii)  $B_0$  (at a  $T_{\text{ref}}$  of 10°C), or iii)  $B_{pk}$ . Species identity was

treated as a random effect on the intercept, the slope, or both. Each model was fitted with and without the phylogenetic variance/covariance matrix to compare the predictions  
426 obtained by ignoring the phylogeny or accounting for it. Two chains were run per model for a length of 3 million generations, and convergence was established as in the previous section after removing samples from the first 300,000 generations. DIC was used to identify  
429 the most appropriate model for each response variable. To evaluate the quality of the best-fitting model, we first calculated the amounts of variance explained by fixed ( $\sigma_{\text{fixed}}^2$ ) and random effects ( $\sigma_{\text{random}}^2$ ), and the residual variance ( $\sigma_{\text{resid}}^2$ ). From these, we calculated the  
432 marginal ( $R_{\text{m}}^2$ ) and conditional ( $R_{\text{c}}^2$ ) coefficients of determination, as described by Nakagawa and Schielzeth (2013):

$$R_{\text{m}}^2 = \frac{\sigma_{\text{fixed}}^2}{\sigma_{\text{fixed}}^2 + \sigma_{\text{random}}^2 + \sigma_{\text{resid}}^2}, \quad (2)$$

$$R_{\text{c}}^2 = \frac{\sigma_{\text{fixed}}^2 + \sigma_{\text{random}}^2}{\sigma_{\text{fixed}}^2 + \sigma_{\text{random}}^2 + \sigma_{\text{resid}}^2}. \quad (3)$$

## Results

### 435 Interspecific correlations and phylogenetic signal

The best-fitting phylogenetic regression model on the basis of DIC had only latitude as a fixed effect (SI Fig. S16). Models with habitat as a predictor were excluded from the DIC  
438 comparison, as the 95% Highest Posterior Density interval of every single habitat coefficient included zero. This likely reflects that any effects of habitat type on TPC parameters are already captured by the phylogenetic correction, especially given that phytoplankton habitat  
441 is phylogenetically structured (SI Fig. S15). In contrast, the 95% HPD intervals of the coefficients of latitude for  $T_{\text{pk}}$  (for both  $T_{\text{ref}}$  values) and  $E$  (for a  $T_{\text{ref}}$  of 0°C only) did not include zero (SI Fig. S17). A minor difference between the analyses with a  $T_{\text{ref}}$  of 0°C and

444 10°C was that in the former case, the model with a second order polynomial in latitude was selected, whereas in the latter case, absolute latitude performed better. The shapes of the two fitted curves (SI Fig. S17) suggest that the effect of latitude on the TPC is particularly  
447 strong for colder-adapted species, leading to a deviation from a strictly linear association.

From the analysis of the resulting interspecific variance/covariance matrices (SI Tables S4, S5, S8, and S9), we identified only two correlations among TPC parameters: i) between  
450  $B_{pk}$  and  $T_{pk}$  (Fig. 3A), and ii) between  $E$  and  $W_{op}$  (SI Fig. S18). The former correlation appears to be driven entirely by the phylogenetically heritable ( $r_{her}$ ) component of the coldest-adapted species in the dataset (i.e., the three data points with  $T_{pk} < 10^\circ\text{C}$  in  
453 Fig. 3A), and becomes nonexistent when these are excluded. Such a weak correlation is consistent with the weak hotter-is-better hypothesis (Fig. 2). Also, as  $E$  and  $W_{op}$  are both measures of thermal sensitivity in the range of temperatures where organisms typically oper-  
456 ate, a negative correlation between them was expected under all TPC evolution hypotheses. In contrast, a negative correlation between  $B_{pk}$  and  $W_{op}$ , which would be expected by the specialist - generalist tradeoff hypothesis, was not supported by the data (Fig. 3B). Fi-  
459 nally, we detected varying amounts of phylogenetic signal in all TPC parameters, with  $T_{pk}$  showing the strongest (perfect phylogenetic) signal (Fig. 4). This was in contrast to the assumptions of the strict hotter-is-better and the perfect biochemical adaptation hypotheses, which posit that  $E$  and  $B_{pk}$  respectively should vary very little across species and not in a  
462 phylogenetically heritable manner (Fig. 2).

Running MCMCglms for the marine species only yielded mostly similar conclusions  
465 (SI section S5.2). The only correlation that could be detected was between  $E$  and  $W_{op}$  (SI Fig. S22). The best-fitting model had a fixed effect of  $\tilde{T}_{50m, 250d}$  (for  $T_{ref} = 0^\circ\text{C}$ ) or  $\text{IQR}(T_{50m, 50d})$  (for  $T_{ref} = 10^\circ\text{C}$ ). More precisely, the analysis of all marine species revealed  
468 a negative relationship between  $\ln(B_{pk})$  and the median temperature of trajectories at a depth of 50 meters and for a duration of 250 days ( $\tilde{T}_{50m, 250d}$ ; SI Fig. S20). If, instead, only marine species with  $T_{pk} > 10^\circ\text{C}$  are included,  $\ln(E)$  is the parameter that associates with

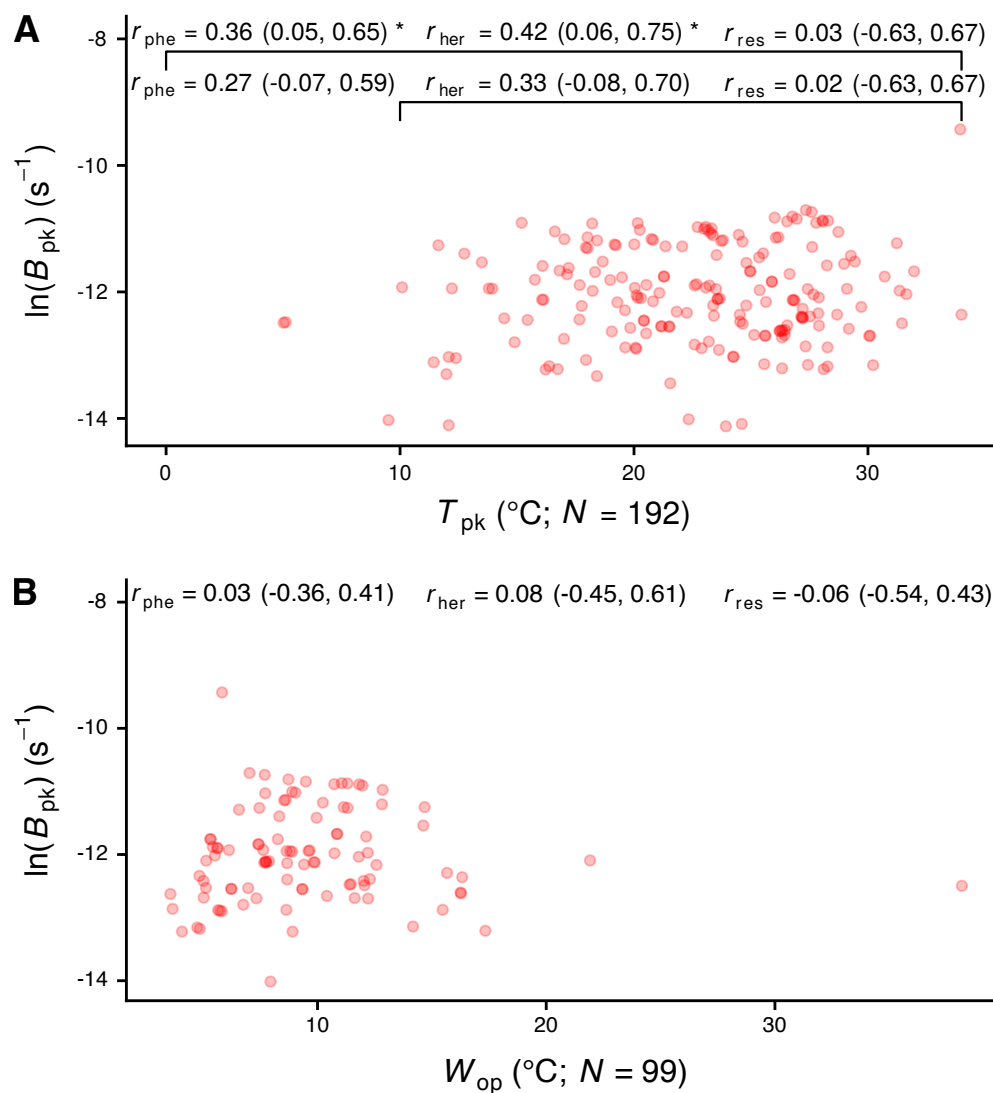

Figure 3. The relationship of  $B_{\text{pk}}$  with  $T_{\text{pk}}$  (A) and  $W_{\text{op}}$  (B).  $r_{\text{phe}}$ ,  $r_{\text{her}}$ , and  $r_{\text{res}}$  stand for phenotypic correlation, phylogenetically heritable correlation and residual correlation respectively. The three correlation coefficients were simultaneously inferred after correcting for phylogeny and for environmental effects (latitude). For panel A, in particular, correlations were estimated across the entire dataset, and after excluding data points with  $T_{\text{pk}} < 10^{\circ}\text{C}$ . The reported estimates are for the correlation of  $\ln(B_{\text{pk}})$  with  $T_{\text{pk}}^2$  and  $\ln(W_{\text{op}})$  respectively, but the horizontal axes are shown in linear scale for simplicity. Values in parentheses correspond to the 95% HPD interval of each correlation coefficient.

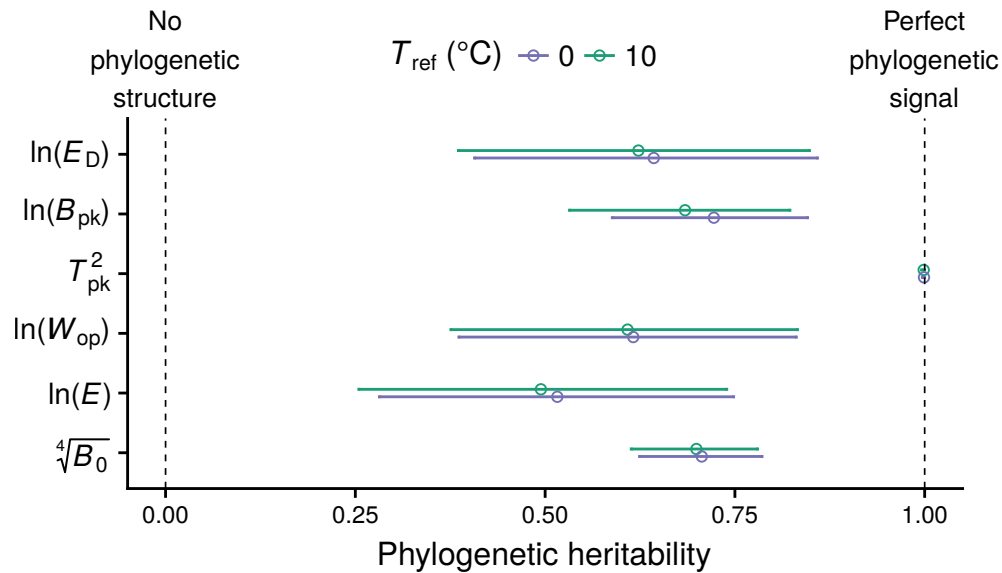

Figure 4. Phylogenetic heritability estimates across the TPC. Circles indicate the mean of the posterior distribution, whereas horizontal bars show the 95% HPD interval. Note that each TPC parameter was transformed towards approximate normality in order to satisfy the requirement of the MCMCglmm method.

471 the environment, increasing with the interquartile range of temperatures of trajectories at a depth of 50 meters and for a duration of 50 days ( $IQR(T_{50m, 50d})$ ; SI Fig. S21). For both  $T_{ref}$  values, the best-fitting Lagrangian models had consistently lower DIC values (at least  
474 30 DIC units difference; see SI Tables S10 and S15) than their non-Lagrangian equivalents.

## Size-scaling of growth rate

Cell volume-growth rate scaling as predicted by the MTE and expected by the two (strict  
477 and weak) hotter-is-better hypotheses, was detected only in the maximum height of the curve ( $R_m^2 = 0.14$  and  $R_c^2 = 0.72$ ; Fig. 5C-D) and not at the performance at a temperature of 0°C or 10°C ( $R_m^2 = 0.00$  and  $R_c^2 = 0.73$ ; Fig. 5A-B). In particular, across the entire dataset,  
480  $B_{pk}$  was found to scale with cell volume raised to an exponent of -0.09 (95% HPD interval = (-0.15, -0.05); Fig. 5C). The best-fitting models always had a random effect of species identity on the intercept and not the slope (SI Table S20).

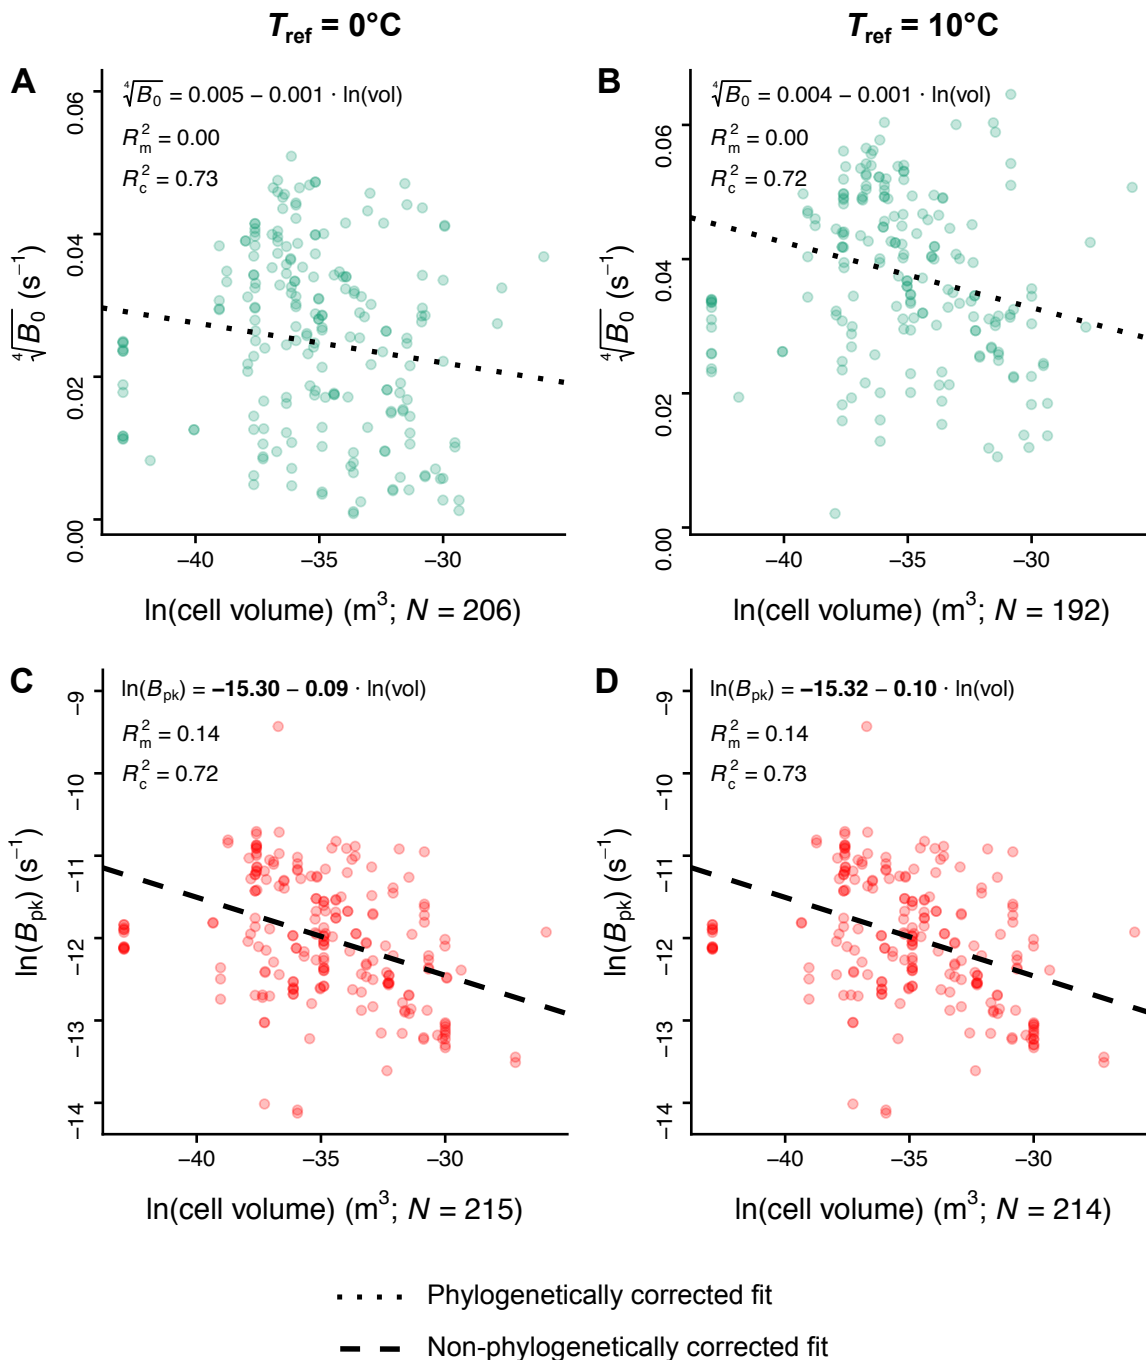

Figure 5. The relationships of cell volume with  $B_0$  (panels A and B) and  $B_{\text{pk}}$  (panels C and D) with  $T_{\text{ref}}$  set to  $0^{\circ}\text{C}$  or  $10^{\circ}\text{C}$ , according to the best-fitting model in each case (see SI Table S20). Coefficients shown in bold had 95% HPD intervals that did not include zero. The sample sizes of  $B_0$  and  $B_{\text{pk}}$  estimates shown here are higher than those reported in SI Figs. S4 and S5, as we included estimates from species with unknown isolation locations. Note that we used different statistical transformations for  $B_0$  and  $B_{\text{pk}}$  so that their estimates would be nearly normally distributed.



## 483 Discussion

In this study we investigated the influence of thermodynamic constraints on the shape of the thermal performance curve of phytoplankton (Fig. 2). To this end, we performed a thorough  
486 analysis of correlations among six TPC parameters. Controlling for the phylogeny of species and their local environment allowed us to better tease apart the relationships among thermal parameters and quantify the influence of phylogeny on each TPC parameter.

489 We detected a positive correlation between  $B_{pk}$  and  $T_{pk}$  (Fig. 3A), which was however very weak and only held if TPCs with very low  $T_{pk}$  values were included. This pattern is inconsistent with the strict hotter-is-better hypothesis (Fig. 2). Therefore, we can conclude  
492 that phytoplankton TPCs do not support the strong thermodynamic constraints extreme of the spectrum of hypotheses. The only other correlation that we detected was between  $E$  and  $W_{op}$  (SI Fig. S18), which is expected because niche width within the operational  
495 temperature range varies inversely with thermal sensitivity ( $E$ ). When focusing only on marine phytoplankton, we detected neither a correlation between  $B_{pk}$  and  $T_{pk}$ , nor any correlation uniquely present in marine species. However, this may reflect the lower statistical  
498 power of the analysis of marine species due to the smaller sample size. In any case, as a correlation between  $B_{pk}$  and  $W_{op}$  was not detected in either the analysis of the entire dataset (Fig. 3B) or in the analysis of correlations from marine species, the generalist-specialist  
501 tradeoff hypothesis can also be rejected.

To further narrow down the location of phytoplankton TPCs on the spectrum of hypothe-  
ses (Fig. 2), we examined the estimates of phylogenetic signal of all six TPC parameters,  
504 which were simultaneously inferred from our multi-response regression models. We used the estimates to test both the strict hotter-is-better hypothesis and the perfect biochemical adaptation hypothesis, which predict a complete lack of phylogenetic signal in  $E$  and  $B_{pk}$   
507 respectively. This analysis also yielded a basic understanding of how the remaining TPC parameters (e.g.,  $T_{pk}$ ) evolve. Overall, the mean phylogenetic signal estimate of  $E$  was the lowest of all TPC parameters, but its 95% HPD interval was well above zero (Fig. 4). This

510 result further supports the rejection of the strict hotter-is-better hypothesis. Moreover, it  
indicates that  $E$  is not nearly constant across species—contrary to what the MTE initially  
assumed (see SI Fig. S1A and Gillooly et al. 2001; Clarke and Fraser 2004; Clarke 2004;  
513 Gillooly et al. 2006; Clarke 2006)—, and provides some insight into the inter- and intraspe-  
cific variation in  $E$  reported by previous studies (e.g., Dell et al. 2011; Nilsson-Örtman et al.  
2013; Pawar et al. 2016).

516 At the right end of the hypotheses spectrum, we were also able to reject the perfect bio-  
chemical adaptation hypothesis because  $B_{pk}$  also exhibited phylogenetic signal. It is worth  
noting that the phylogenetic signal in  $B_{pk}$  does not merely reflect that the local environment  
519 is phylogenetically heritable (with closely related species occurring in geographically close  
environments), as the correlation between phylogenetic distance and geographical distance  
was almost zero (SI section S5.1). In any case, variation in  $B_{pk}$  was not found to be latitudi-  
522 nally structured across the entire dataset (contrary to  $E$  and  $T_{pk}$ ; SI Fig. S17), albeit marine  
species that experienced low temperatures had slightly higher  $B_{pk}$  values (SI Fig. S20A).  
An elevation of  $B_{pk}$  (or  $B_0$ ) in organisms living at cold environments could arise from the  
525 process of metabolic cold adaptation, which has sometimes been detected in other species  
groups (see Wohlschlag 1960; Clarke 1993; Seibel et al. 2007; White et al. 2012; Clarke 2017;  
DeLong et al. 2018).

528 Lastly, we examined the effect of body size on growth rate. We found a weak nega-  
tive scaling of  $B_{pk}$  (maximum height of the TPC) with cell volume, whereas trait values  
normalised to 0°C or 10°C did not exhibit any size scaling (Fig. 5). This suggests an en-  
531 ergetic tradeoff between cell volume and  $B_{pk}$  in phytoplankton, similar to the prediction  
of the supply-demand body size optimization model of DeLong (2012). That is, the main-  
tenance of a large cell volume should incur a high energetic cost, reducing the amount of  
534 energy that can be directed to cell growth, and vice versa. The weak negative size scaling of  
 $B_{pk}$  is consistent with our only remaining hypothesis: the weak hotter-is-better hypothesis.  
Indeed, given the weak correlations of i)  $B_{pk}$  with  $T_{pk}$ , and ii)  $B_{pk}$  with cell volume, an

537 increase in  $T_{pk}$  would lead to a weak increase in  $B_{pk}$  and, indirectly, to a weak decrease in  
cell volume. Therefore, a decrease in cell size with warming—which has often been observed  
(Winder et al., 2009; Yvon-Durocher et al., 2011; Peter and Sommer, 2013; Sommer et al.,  
540 2017)—could be constrained by an indirect correlation between  $T_{pk}$  and cell volume.

Our results about the weak relationship between  $B_{pk}$  and  $T_{pk}$ , and the scaling of the  
former with cell volume are consistent with the conclusions of Kremer et al. (2017). They  
543 found evidence for the effects of temperature, taxonomic group, and cell size on the maximum  
growth rate of phytoplankton, effectively suggesting adaptation of  $B_{pk}$  across lineages. This  
further means that the classical Eppley curve (Eppley, 1972; Bissinger et al., 2008) does not  
546 necessarily indicate as strong a global (thermodynamic) constraint on maximum performance  
across species as has been previously thought. In this context, we also note that ideally cell  
size should be directly accounted for in analyses of TPC evolution. This was partially done  
549 in our study (i.e., by examining the relationship of cell volume with  $B_0$  and  $B_{pk}$ ), as we could  
not obtain cell volume measurements for all species in our dataset.

Given all these results, we conclude that the TPCs of phytoplankton evolve in the gen-  
552 eral absence of hard thermodynamic constraints, similarly to the expectations of a very weak  
hotter-is-better hypothesis (Fig. 3A). A possible mechanistic interpretation of the observed  
patterns is that, at very low temperatures, the limiting factor is low available kinetic energy,  
555 which constrains the rate of biochemical reactions. At higher temperatures, on the other  
hand, maximum trait performance appears temperature-independent, suggesting the pres-  
ence of biophysical or other constraints. For example, given that  $B_{pk}$  scales negatively with  
558 cell volume, a lower limit in cell volume (e.g., due to the need for maintaining non-scalable  
cellular components such as membranes; Raven 1998) will also set an upper limit to the  
maximum possible growth rate.

561 To the best of our knowledge, a thorough analysis of the correlation structure among  
parameters that control the entire range of the TPC has never been conducted. At most,  
previous studies have investigated the existence of correlations between two or three selected

564 TPC parameters (e.g., between  $T_{pk}$  and  $B_{pk}$ ; see Frazier et al. 2006 and Sørensen et al. 2018).  
This can be problematic for two reasons. First, by only focusing on parameters that control  
the peak of the TPC, such studies ignore potential correlations with parameters in other areas  
567 of the curve (e.g.,  $E$ ). Second, even if a statistical correlation can be observed between two  
thermal parameters, it could be driven by the covariance of the two parameters with other,  
overlooked TPC parameters. Indeed, many studies on TPCs do not explicitly account for  
570 phylogenetic relationships among species at all (but see Sal et al. 2015 for a phylogenetically-  
controlled study on the size-scaling of phytoplankton growth rate). Our results highlight the  
fact that ignoring potential phylogenetic effects can make it harder to differentiate between  
573 alternative hypotheses on the evolution of TPCs, and may leave studies vulnerable to biases  
introduced by phylogenetic nonindependence (e.g., an observed relationship between two  
TPC parameters could arise solely from uneven phylogenetic sampling).

576 Perhaps the most striking result of this study is that we detected a very limited number  
of correlations or tradeoffs across the entire TPC. One potential explanation for this could  
be that different phytoplankton lineages have evolved distinct strategies to maximise their  
579 fitness. Such strategies may involve thermal parameter correlations that are lineage-specific  
and hence hard to detect. A similar analysis performed separately for each phytoplankton  
phylum could potentially address this question. However, obtaining accurate estimates of  
582 lineage-specific variance/covariance matrices of TPC parameters would require bigger ther-  
mal performance datasets than those that—to our knowledge—are currently available. It  
would also be interesting to investigate whether the phylogenetic signal of TPC parameters  
585 and the correlations among them vary across traits (e.g., photosynthesis rate, respiration  
rate) or phylogenetic groups (e.g., bacteria, plants). Such analyses could provide useful in-  
sights into the nature of possible constraints and their degree of influence on the shape of  
588 the thermal performance curve across different branches of the tree of life.

Another direction that could be further pursued involves investigating the effects of the  
marine environment on phytoplankton TPCs, and, in particular, how TPCs adapt to tem-

591 perature fluctuations due to oceanic drifting (see e.g., Schaum et al. 2018). It is worth  
emphasising that, in our study, models that accounted for oceanic drifting of marine phyto-  
plankton (models with Lagrangian variables) systematically performed better (in terms of  
594 DIC) than models that only incorporated the latitude or the sea surface temperature of the  
isolation locations of the strains. While we detected some associations between environmen-  
tal variables and TPC parameters, the low sample size and the coarse modelling of drifting  
597 prevent us from drawing very strong conclusions. More precisely, some of the limitations of  
our approach were that simulations were done at only three depths, and did not account for  
the vertical movement of phytoplankton or the concentration of nutrients. A more in-depth  
600 analysis on these matters could be the focus of future studies.

Finally, there is mounting evidence that the shape of TPCs is also affected by a range  
of other factors such as nutrient availability (Thomas et al., 2017; Bestion et al., 2018),  
603 oxygen supply (Gangloff and Telemeco, 2018), and predation risk (Dell et al., 2014; Luhring  
et al., 2018). Thus, to improve our understanding of how species adapt to different thermal  
environments, future studies could investigate the adaptive potential of organismal responses  
606 not only to temperature, but to the interaction of multiple factors. Such an approach  
could uncover important adaptive constraints which may not be detectable by studying the  
responses of biological traits to each factor in isolation.

## 609 **Author contributions**

DGK and SP conceived and designed the study. DGK performed all analyses other than the  
simulations of marine phytoplankton trajectories, which were conducted by EvS and ML.  
612 DGK, GYD, TGB, and SP interpreted the results. DGK wrote the initial manuscript, with  
comments and additions provided by all other coauthors.

## Acknowledgements

615 We thank Bernardo García-Carreras, I. Colin Prentice, Guy Woodward, and Andrew G.  
Hirst for useful discussions and comments. We are also grateful to the CIPRES Science  
Gateway (Miller et al., 2010) and Imperial College London’s High Performance Computing  
618 service (doi:10.14469/hpc/2232) for access to computational resources. DGK was supported  
by a Natural Environment Research Council (NERC) Doctoral Training Partnership (DTP)  
scholarship (NE/L002515/1). SP and GYD were supported by NERC grants NE/M004740/1  
621 and NE/M003205/1 respectively.

## References

- Aberer, A. J., K. Kobert, and A. Stamatakis. 2014. ExaBayes: massively parallel Bayesian  
624 tree inference for the whole-genome era. *Mol. Biol. Evol.* 31:2553–2556.
- Angilletta, M. J. 2009. *Thermal adaptation: a theoretical and empirical synthesis*. Oxford  
University Press.
- 627 Angilletta, M. J., R. B. Huey, and M. R. Frazier. 2009. Thermodynamic effects on organismal  
performance: is hotter better? *Physiol. Biochem. Zool.* 83:197–206.
- Atkinson, D. 1996. Ectotherm life-history responses to developmental temperature. Pp. 183–  
630 204. *in* I. A. Johnston and A. F. Bennett, eds. *Animals and Temperature: Phenotypic  
and Evolutionary Adaptation*. Cambridge University Press, Cambridge.
- Banzon, V., T. M. Smith, T. M. Chin, C. Liu, and W. Hankins. 2016. A long-term record  
633 of blended satellite and in situ sea-surface temperature for climate monitoring, modeling  
and environmental studies. *Earth Syst. Sci. Data* 8:165–176.
- Bestion, E., C.-E. Schaum, and G. Yvon-Durocher. 2018. Nutrient limitation constrains  
636 thermal tolerance in freshwater phytoplankton. *Limnol. Oceanogr. Lett.* 3:436–443.

- Bissinger, J. E., D. J. S. Montagnes, J. Sharples, and D. Atkinson. 2008. Predicting marine phytoplankton maximum growth rates from temperature: Improving on the Eppley curve using quantile regression. *Limnol. Oceanogr.* 53:487–493.
- Brooks, S. P., and A. Gelman. 1998. General methods for monitoring convergence of iterative simulations. *J. Comput. Graph. Stat.* 7:434–455.
- Brown, J. H., J. F. Gillooly, A. P. Allen, V. M. Savage, and G. B. West. 2004. Toward a metabolic theory of ecology. *Ecology* 85:1771–1789.
- Clarke, A. 1993. Seasonal acclimatization and latitudinal compensation in metabolism: do they exist? *Funct. Ecol.* 7:139–149.
- . 2004. Is there a universal temperature dependence of metabolism? *Funct. Ecol.* 18:252–256.
- . 2006. Temperature and the metabolic theory of ecology. *Funct. Ecol.* 20:405–412.
- . 2017. *Principles of Thermal Ecology: Temperature, Energy, and Life*. Oxford University Press.
- Clarke, A., and K. Fraser. 2004. Why does metabolism scale with temperature? *Funct. Ecol.* 18:243–251.
- Dell, A. I., S. Pawar, and V. M. Savage. 2011. Systematic variation in the temperature dependence of physiological and ecological traits. *Proc. Natl. Acad. Sci. U.S.A* 108:10591–10596.
- . 2014. Temperature dependence of trophic interactions are driven by asymmetry of species responses and foraging strategy. *J. Anim. Ecol.* 83:70–84.
- DeLong, J. P. 2012. Experimental demonstration of a ‘rate–size’ trade-off governing body size optimization. *Evol. Ecol. Res.* 14:343–352.

- 660 DeLong, J. P., G. Bachman, J. P. Gibert, T. M. Luhring, K. L. Montooth, A. Neyer, and  
B. Reed. 2018. Habitat, latitude and body mass influence the temperature dependence of  
metabolic rate. *Biol. Lett.* 14:20180442.
- 663 DeLong, J. P., J. P. Gibert, T. M. Luhring, G. Bachman, B. Reed, A. Neyer, and K. Mon-  
tooth. 2017. The combined effects of reactant kinetics and enzyme stability explain the  
temperature dependence of metabolic rates. *Ecol. Evol.* 7:3940–3950.
- 666 Doblin, M. A., and E. van Sebille. 2016. Drift in ocean currents impacts intergenerational  
microbial exposure to temperature. *P. Natl. Acad. Sci. USA* 113:5700–5705.
- Drummond, A. J., S. Y. Ho, M. J. Phillips, and A. Rambaut. 2006. Relaxed phylogenetics  
669 and dating with confidence. *PLoS Biol.* 4:e88.
- Eppley, R. W. 1972. Temperature and phytoplankton growth in the sea. *Fish. Bull.* 70:1063–  
1085.
- 672 Falkowski, P., and J. Raven. 2013. *Aquatic Photosynthesis: Second Edition*. Princeton  
University Press. URL <https://books.google.co.uk/books?id=kUCrAQAQBAJ>.
- Feller, G. 2010. Protein stability and enzyme activity at extreme biological temperatures.  
675 *J. Phys. Condens. Matter* 22:323101.
- Field, C. B., M. J. Behrenfeld, J. T. Randerson, and P. Falkowski. 1998. Primary production  
of the biosphere: integrating terrestrial and oceanic components. *Science* 281:237–240.
- 678 Flouri, T., and A. Stamatakis. 2012. An improvement to DPPDIV. Tech. rep. Heidel-  
berg Institute for Theoretical Studies, Heidelberg, Germany, Exelixis-RRDR-2012-7. URL  
<http://sco.h-its.org/exelixis/pubs/Exelixis-RRDR-2012-7.pdf>.
- 681 Francis, E. A., P. D. Moldowan, M. A. Greischar, and N. Rollinson. 2019. Anthropogenic  
nest sites provide warmer incubation environments than natural nest sites in a population  
of oviparous reptiles near their northern range limit. *Oecologia* 190:511–522.



- 684 Frazier, M., R. B. Huey, and D. Berrigan. 2006. Thermodynamics constrains the evolution  
of insect population growth rates: “warmer is better”. *Am. Nat.* 168:512–520.
- Gangloff, E. J., and R. S. Telemeco. 2018. High temperature, oxygen, and performance:  
687 Insights from reptiles and amphibians. *Integr. Comp. Biol.* 58:9–24.
- Garamszegi, L. Z., and A. P. Møller. 2011. Nonrandom variation in within-species sample  
size and missing data in phylogenetic comparative studies. *Syst. Biol.* 60:876–880.
- 690 García-Carreras, B., S. Sal, D. Padfield, D.-G. Kontopoulos, E. Bestion, C.-E. Schaum,  
G. Yvon-Durocher, and S. Pawar. 2018. Role of carbon allocation efficiency in the tem-  
perature dependence of autotroph growth rates. *Proc. Natl. Acad. Sci. U.S.A* 115:E7361–  
693 E7368.
- Gelman, A., and D. B. Rubin. 1992. Inference from iterative simulation using multiple  
sequences. *Stat. Sci.* 7:457–472.
- 696 Gillooly, J., A. Allen, V. Savage, E. Charnov, G. West, and J. Brown. 2006. Response to  
Clarke and Fraser: effects of temperature on metabolic rate. *Funct. Ecol.* 20:400–404.
- Gillooly, J. F., J. H. Brown, G. B. West, V. M. Savage, and E. L. Charnov. 2001. Effects of  
699 size and temperature on metabolic rate. *Science* 293:2248–2251.
- Global Names Architecture. 2017. Global Names Resolver. <http://resolver.globalnames.org/>. [Last accessed on December 7th, 2017].
- 702 Gu, X., Y.-X. Fu, and W.-H. Li. 1995. Maximum likelihood estimation of the heterogeneity  
of substitution rate among nucleotide sites. *Mol. Biol. Evol.* 12:546–557.
- Guindon, S., J.-F. Dufayard, V. Lefort, M. Anisimova, W. Hordijk, and O. Gascuel. 2010.  
705 New algorithms and methods to estimate maximum-likelihood phylogenies: assessing the  
performance of PhyML 3.0. *Syst. Biol.* 59:307–321.

- Hadfield, J., and S. Nakagawa. 2010. General quantitative genetic methods for comparative  
708 biology: phylogenies, taxonomies and multi-trait models for continuous and categorical  
characters. *J. Evol. Biol.* 23:494–508.
- Hadfield, J. D. 2010. MCMC Methods for Multi-Response Generalized Linear Mixed Models:  
711 The MCMCglmm R Package. *J. Stat. Softw.* 33:1–22. URL [http://www.jstatsoft.org/  
v33/i02/](http://www.jstatsoft.org/v33/i02/).
- Heath, T. A., M. T. Holder, and J. P. Huelsenbeck. 2012. A Dirichlet process prior for  
714 estimating lineage-specific substitution rates. *Mol. Biol. Evol.* 29:939–955.
- Hinchliff, C. E., S. A. Smith, J. F. Allman, J. G. Burleigh, R. Chaudhary, L. M. Coghill,  
K. A. Crandall, J. Deng, B. T. Drew, R. Gazis, K. Gude, D. S. Hibbett, L. A. Katz, H. D.  
717 Laughinghouse, E. J. McTavish, P. E. Midford, C. L. Owen, R. H. Ree, J. A. Rees, D. E.  
Soltis, T. Williams, and K. A. Cranston. 2015. Synthesis of phylogeny and taxonomy into  
a comprehensive tree of life. *P. Natl. Acad. Sci. USA* 112:12764–12769.
- 720 Hochachka, P. W., and G. N. Somero. 2002. *Biochemical Adaptation: Mechanism and  
Process in Physiological Evolution*. Oxford University Press.
- Hoffmann, A. A., and C. M. Sgrò. 2011. Climate change and evolutionary adaptation. *Nature*  
723 470:479–485.
- Huey, R. B., and P. E. Hertz. 1984. Is a jack-of-all-temperatures a master of none? *Evolution*  
38:441–444.
- 726 Jackson, C. H. 2011. Multi-State Models for Panel Data: The msm Package for R. *J. Stat.  
Softw.* 38:1–29. URL <http://www.jstatsoft.org/v38/i08/>.
- Kamilar, J. M., and N. Cooper. 2013. Phylogenetic signal in primate behaviour, ecology and  
729 life history. *Philos. Trans. R. Soc. Lond., B, Biol. Sci.* 368:20120341.

- Katoh, K., and D. M. Standley. 2013. MAFFT multiple sequence alignment software version 7: improvements in performance and usability. *Mol. Biol. Evol.* 30:772–780.
- 732 Kingsolver, J. G., and R. B. Huey. 2008. Size, temperature, and fitness: three rules. *Evol. Ecol. Res.* 10:251–268.
- Knies, J. L., J. G. Kingsolver, and C. L. Burch. 2009. Hotter is better and broader: thermal  
735 sensitivity of fitness in a population of bacteriophages. *Am. Nat.* 173:419–430.
- Kontopoulos, D. G., B. García-Carreras, S. Sal, T. P. Smith, and S. Pawar. 2018. Use and  
misuse of temperature normalisation in meta-analyses of thermal responses of biological  
738 traits. *PeerJ* 6:e4363.
- Kremer, C. T., J. P. Gillette, L. G. Rudstam, P. Brettum, and R. Ptacnik. 2014. A com-  
pendium of cell and natural unit biovolumes for >1200 freshwater phytoplankton species.  
741 *Ecology* 95:2984–2984.
- Kremer, C. T., M. K. Thomas, and E. Litchman. 2017. Temperature- and size-scaling of  
phytoplankton population growth rates: Reconciling the Eppley curve and the metabolic  
744 theory of ecology. *Limnol. Oceanogr.* 62:1658–1670.
- Lange, M., and E. van Sebille. 2017. Parcels v0.9: prototyping a Lagrangian ocean analysis  
framework for the petascale age. *Geosci. Model. Dev.* 10:4175–4186. URL [https://www.  
747 geosci-model-dev.net/10/4175/2017/](https://www.geosci-model-dev.net/10/4175/2017/).
- López-Urrutia, Á., E. San Martín, R. P. Harris, and X. Irigoien. 2006. Scaling the metabolic  
balance of the oceans. *P. Natl. Acad. Sci. USA* 103:8739–8744.
- 750 Luhning, T. M., J. M. Vavra, C. E. Cressler, and J. P. DeLong. 2018. Predators modify the  
temperature dependence of life-history trade-offs. *Ecol. Evol.* 8:8818–8830.
- Martin, T. L., and R. B. Huey. 2008. Why “suboptimal” is optimal: Jensen’s inequality and  
753 ectotherm thermal preferences. *Am. Nat.* 171:E102–E118.

- Masumoto, Y., H. Sasaki, T. Kagimoto, N. Komori, A. Ishida, Y. Sasai, T. Miyama, T. Motoi, H. Mitsudera, K. Takahashi, H. Sakuma, and T. Yamagata. 2004. A fifty-year eddy-resolving simulation of the world ocean: preliminary outcomes of OFES (OGCM for the Earth Simulator). *J. Earth Simulator* 1:35–56.
- 756
- Miller, M. A., W. Pfeiffer, and T. Schwartz. 2010. Creating the CIPRES Science Gateway for inference of large phylogenetic trees. *in* Gateway Computing Environments Workshop (GCE), 2010. Pp. 1–8. Ieee.
- 759
- Morel, A., Y. Huot, B. Gentili, P. J. Werdell, S. B. Hooker, and B. A. Franz. 2007. Examining the consistency of products derived from various ocean color sensors in open ocean (Case 1) waters in the perspective of a multi-sensor approach. *Remote Sens. Environ.* 111:69–88.
- 762
- Morton, S. L., D. R. Norris, and J. W. Bomber. 1992. Effect of temperature, salinity and light intensity on the growth and seasonality of toxic dinoflagellates associated with ciguatera. *J. Exp. Mar. Biol. Ecol.* 157:79–90.
- 765
- Nabhan, A. R., and I. N. Sarkar. 2012. The impact of taxon sampling on phylogenetic inference: a review of two decades of controversy. *Brief. Bioinform.* 13:122–134.
- 768
- Nakagawa, S., and R. P. Freckleton. 2008. Missing inaction: the dangers of ignoring missing data. *Trends Ecol. Evol.* 23:592–596.
- 771
- Nakagawa, S., and H. Schielzeth. 2013. A general and simple method for obtaining  $R^2$  from generalized linear mixed-effects models. *Methods Ecol. Evol.* 4:133–142.
- 774
- Nilsson-Örtman, V., R. Stoks, M. De Block, H. Johansson, and F. Johansson. 2013. Latitudinally structured variation in the temperature dependence of damselfly growth rates. *Ecol. Lett.* 16:64–71.
- Oehlert, G. W. 1992. A note on the delta method. *Am. Stat.* 46:27–29.

- 777 Padfield, D., C. Lowe, A. Buckling, R. Ffrench-Constant, S. Jennings, F. Shelley, J. S.  
Ólafsson, and G. Yvon-Durocher. 2017. Metabolic compensation constrains the tempera-  
ture dependence of gross primary production. *Ecol. Lett.* 20:1250–1260.
- 780 Padfield, D., G. Yvon-Durocher, A. Buckling, S. Jennings, and G. Yvon-Durocher. 2016.  
Rapid evolution of metabolic traits explains thermal adaptation in phytoplankton. *Ecol.*  
*Lett.* 19:133–142.
- 783 Pagel, M. 1999. Inferring the historical patterns of biological evolution. *Nature* 401:877–884.
- Palmer, J. R., and I. J. Totterdell. 2001. Production and export in a global ocean ecosystem  
model. *Deep Sea Res. Part I Oceanogr. Res. Pap.* 48:1169–1198.
- 786 Parr, C. S., N. Wilson, P. Leary, K. S. Schulz, K. Lans, L. Walley, J. A. Hammock, A. God-  
dard, J. Rice, M. Studer, J. T. G. Holmes, and R. J. Corrigan. 2014. The Encyclopedia  
of Life v2: providing global access to knowledge about life on earth. *Biodivers. Data J.* .
- 789 Pawar, S., A. I. Dell, and V. M. Savage. 2015. From metabolic constraints on individuals to  
the dynamics of ecosystems. Pp. 3–36. *in* A. Belgrano, G. Woodward, and U. Jacob, eds.  
*Aquatic Functional Biodiversity: An Ecological and Evolutionary Perspective*. Elsevier.
- 792 Pawar, S., A. I. Dell, V. M. Savage, and J. L. Knies. 2016. Real versus artificial variation in  
the thermal sensitivity of biological traits. *Am. Nat.* 187:E41–E52.
- Peter, K. H., and U. Sommer. 2013. Phytoplankton cell size reduction in response to warming  
795 mediated by nutrient limitation. *PLoS One* 8:e71528.
- Pörtner, H. O., A. F. Bennett, F. Bozinovic, A. Clarke, M. A. Lardies, M. Lucassen, B. Pel-  
ster, F. Schiemer, and J. H. Stillman. 2006. Trade-offs in thermal adaptation: The need for  
798 a molecular to ecological integration. *Physiological and Biochemical Zoology* 79:295–313.
- Rambaut, A., and A. J. Drummond. 2017. TreeAnnotator. [http://beast.community/  
treeannotator](http://beast.community/treeannotator). [Last accessed on November 7th, 2017].

- 801 Raven, J. 1998. The twelfth Tansley Lecture. Small is beautiful: the picophytoplankton.  
Funct. Ecol. 12:503–513.
- Reuman, D. C., R. D. Holt, and G. Yvon-Durocher. 2014. A metabolic perspective on  
804 competition and body size reductions with warming. J. Anim. Ecol. 83:59–69.
- Ritchie, M. E. 2018. Reaction and diffusion thermodynamics explain optimal temperatures  
of biochemical reactions. Sci. Rep. 8:11105.
- 807 Rose, J. M., and D. A. Caron. 2007. Does low temperature constrain the growth rates of  
heterotrophic protists? Evidence and implications for algal blooms in cold waters. Limnol.  
Oceanogr. 52:886–895.
- 810 Sal, S., L. Alonso-Sáez, J. Bueno, F. C. García, and Á. López-Urrutia. 2015. Thermal  
adaptation, phylogeny, and the unimodal size scaling of marine phytoplankton growth.  
Limnol. Oceanogr. 60:1212–1221.
- 813 Salis, L., M. Lof, M. van Asch, and M. E. Visser. 2016. Modeling winter moth *Operophtera*  
*brumata* egg phenology: nonlinear effects of temperature and developmental stage on  
developmental rate. Oikos 125:1772–1781.
- 816 Schaum, C.-E., A. Buckling, N. Smirnov, D. Studholme, and G. Yvon-Durocher. 2018.  
Environmental fluctuations accelerate molecular evolution of thermal tolerance in a marine  
diatom. Nat. Commun. 9.
- 819 Schoolfield, R., P. Sharpe, and C. Magnuson. 1981. Non-linear regression of biological  
temperature-dependent rate models based on absolute reaction-rate theory. J. Theor.  
Biol. 88:719–731.
- 822 Seibel, B. A., A. Dymowska, and J. Rosenthal. 2007. Metabolic temperature compensation  
and coevolution of locomotory performance in pteropod molluscs. Integr. Comp. Biol.  
47:880–891.

- 825 Sommer, U., K. H. Peter, S. Genitsaris, and M. Moustaka-Gouni. 2017. Do marine phyto-  
plankton follow Bergmann's rule *sensu lato*? Biol. Rev. 92:1011–1026.
- Sørensen, J. G., C. R. White, G. A. Duffy, and S. L. Chown. 2018. A widespread ther-  
828 modynamic effect, but maintenance of biological rates through space across life's major  
domains. Proc. R. Soc. Lond. B Biol. Sci. 285:20181775.
- Spiegelhalter, D. J., N. G. Best, B. P. Carlin, and A. van der Linde. 2002. Bayesian measures  
831 of model complexity and fit. J. R. Stat. Soc. Series B Stat. Methodol. 64:583–639.
- Stamatakis, A. 2014. RAxML version 8: a tool for phylogenetic analysis and post-analysis  
of large phylogenies. Bioinformatics 30:1312–1313.
- 834 Stock, C. A., J. P. Dunne, and J. G. John. 2014. Global-scale carbon and energy flows  
through the marine planktonic food web: An analysis with a coupled physical–biological  
model. Prog. Oceanogr. 120:1–28.
- 837 Symonds, M. R., and S. P. Blomberg. 2014. A primer on phylogenetic generalised least  
squares. Pp. 105–130. *in* Modern Phylogenetic Comparative Methods and Their Applica-  
tion in Evolutionary Biology: Concepts and Practice. Springer.
- 840 Tan, G., M. Muffato, C. Ledergerber, J. Herrero, N. Goldman, M. Gil, and C. Dessimoz.  
2015. Current methods for automated filtering of multiple sequence alignments frequently  
worsen single-gene phylogenetic inference. Syst. Biol. 64:778–791.
- 843 Tavaré, S. 1986. Some probabilistic and statistical problems in the analysis of DNA se-  
quences. Pp. 57–86. *in* R. M. Miura, ed. Some Mathematical Questions in Biology: DNA  
Sequence Analysis. American Mathematical Society, Providence (RI).
- 846 Thomas, M. K., M. Aranguren-Gassis, C. T. Kremer, M. R. Gould, K. Anderson, C. A.  
Klausmeier, and E. Litchman. 2017. Temperature–nutrient interactions exacerbate sensi-  
tivity to warming in phytoplankton. Glob. Chang. Biol. 23:3269–3280.

- 849 Thomas, M. K., C. T. Kremer, C. A. Klausmeier, and E. Litchman. 2012. A global pattern  
of thermal adaptation in marine phytoplankton. *Science* 338:1085–1088.
- Tierney, N. J., and D. H. Cook. 2018. Expanding tidy data principles to facilitate  
852 missing data exploration, visualization and assessment of imputations. arXiv preprint  
arXiv:1809.02264 .
- de Villemereuil, P., and S. Nakagawa. 2014. General quantitative genetic methods for com-  
855 parative biology. Pp. 287–303. *in* L. Z. Garamszegi, ed. *Modern Phylogenetic Comparative  
Methods and Their Application in Evolutionary Biology: Concepts and Practice*. Springer.
- White, C. R., L. A. Alton, and P. B. Frappell. 2012. Metabolic cold adaptation in fishes  
858 occurs at the level of whole animal, mitochondria and enzyme. *Proc. R. Soc. Lond. B  
Biol. Sci.* 279:1740–1747.
- Wiens, J. J., and J. Tiu. 2012. Highly incomplete taxa can rescue phylogenetic analyses  
861 from the negative impacts of limited taxon sampling. *PLoS One* 7:e42925.
- Winder, M., J. E. Reuter, and S. G. Schladow. 2009. Lake warming favours small-sized  
planktonic diatom species. *Proc. R. Soc. Lond. B Biol. Sci.* 276:427–435.
- 864 Wohlschlag, D. E. 1960. Metabolism of an Antarctic fish and the phenomenon of cold  
adaptation. *Ecology* 41:287–292.
- Yvon-Durocher, G., J. M. Montoya, M. Trimmer, and G. Woodward. 2011. Warming alters  
867 the size spectrum and shifts the distribution of biomass in freshwater ecosystems. *Glob.  
Chang. Biol.* 17:1681–1694.
